# Supplementary material for: Neuronal hyperexcitability drives central and peripheral nervous system tumor progression in models of neurofibromatosis-1
Source: PubMed Central journal article supplement (PMC9120229; doi:10.1038/s41467-022-30466-6), 2022-05-19
Supplement: 41467_2022_30466_MOESM1_ESM.pdf [file 41467_2022_30466_MOESM1_ESM.pdf]

## **Supplementary Data**

*Neuronal hyperexcitability drives central and peripheral nervous system tumor progression in models of Neurofibromatosis-1*

Corina Anastasaki, Juan Mo, Ji-Kang Chen, Jit Chatterjee, Yuan Pan, Suzanne M. Scheaffer, Olivia Cobb, Michelle Monje, Lu Q. Le, David H. Gutmann

### **Figures**

**Supplementary Figure 1.** Characterization of the Arg1809Cys *Nf1*-mutant mouse strain; relative to Figures 1-7

**Supplementary Figure 2.** Analysis of Arg1809Cys *Nf1*-mutant neuron signaling; relative to Figures 2-3

**Supplementary Figure 3.** *Nf1*-mutant hippocampal neuron midkine secretion is dependent on neuronal hyperexcitability; relative to Figures 2-3

**Supplementary Figure 4.** Genetic silencing of *Hcn1* and *Hcn2* results in neuronal death; relative to Figures 2-3, 5-7

**Supplementary Figure 5.** Human sh*NFI* Schwann cell and sensory neuron analysis; relative to Figure 5

**Supplementary Figure 6.** COL1A2 is uniquely expressed by *NFI*-mutant peripheral nervous system neurons; relative to Figures 5-7

### **Tables**

**Supplementary Table 1.** Antibodies used.

**Supplementary Table 2.** Oligonucleotides used for quantitative real-time PCR.

**Supplementary Table 3.** Microarray datasets used for *COL1A2* analysis.

### **References**

**References, relevant to Supplementary Table 1.**

**A**

|       | WT | 5425C>T+/- | 5425C>T-/- |
|-------|----|------------|------------|
|       | 2  | 2          | 0          |
|       | 0  | 2          | 0          |
|       | 3  | 3          | 0          |
|       | 1  | 4          | 0          |
|       | 1  | 3          | 0          |
|       | 3  | 6          | 0          |
| Total | 13 | 20         | 0          |

**B**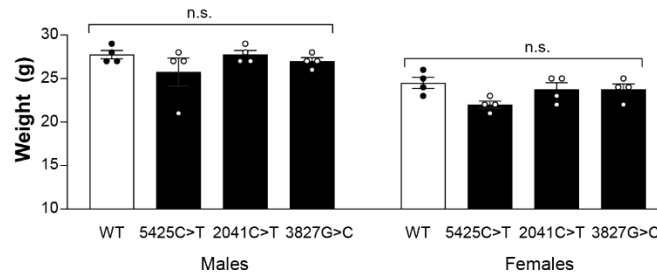

### Supplementary Figure 1. Characterization of the Arg1809Cys *Nf1*-mutant mouse strain

**A.** Summary of litters of Arg1809Cys *Nf1* heterozygous mouse intercrosses.

**B.** Weights of male and female Arg1809Cys *Nf1*-mutant mice are similar to WT littermates at 1 month of age. n=4 for all groups.

Data are represented as means ± SEM. One-way ANOVA with Bonferroni post-test correction. p values were not significant (ns). Source data are provided as a Source Data file.

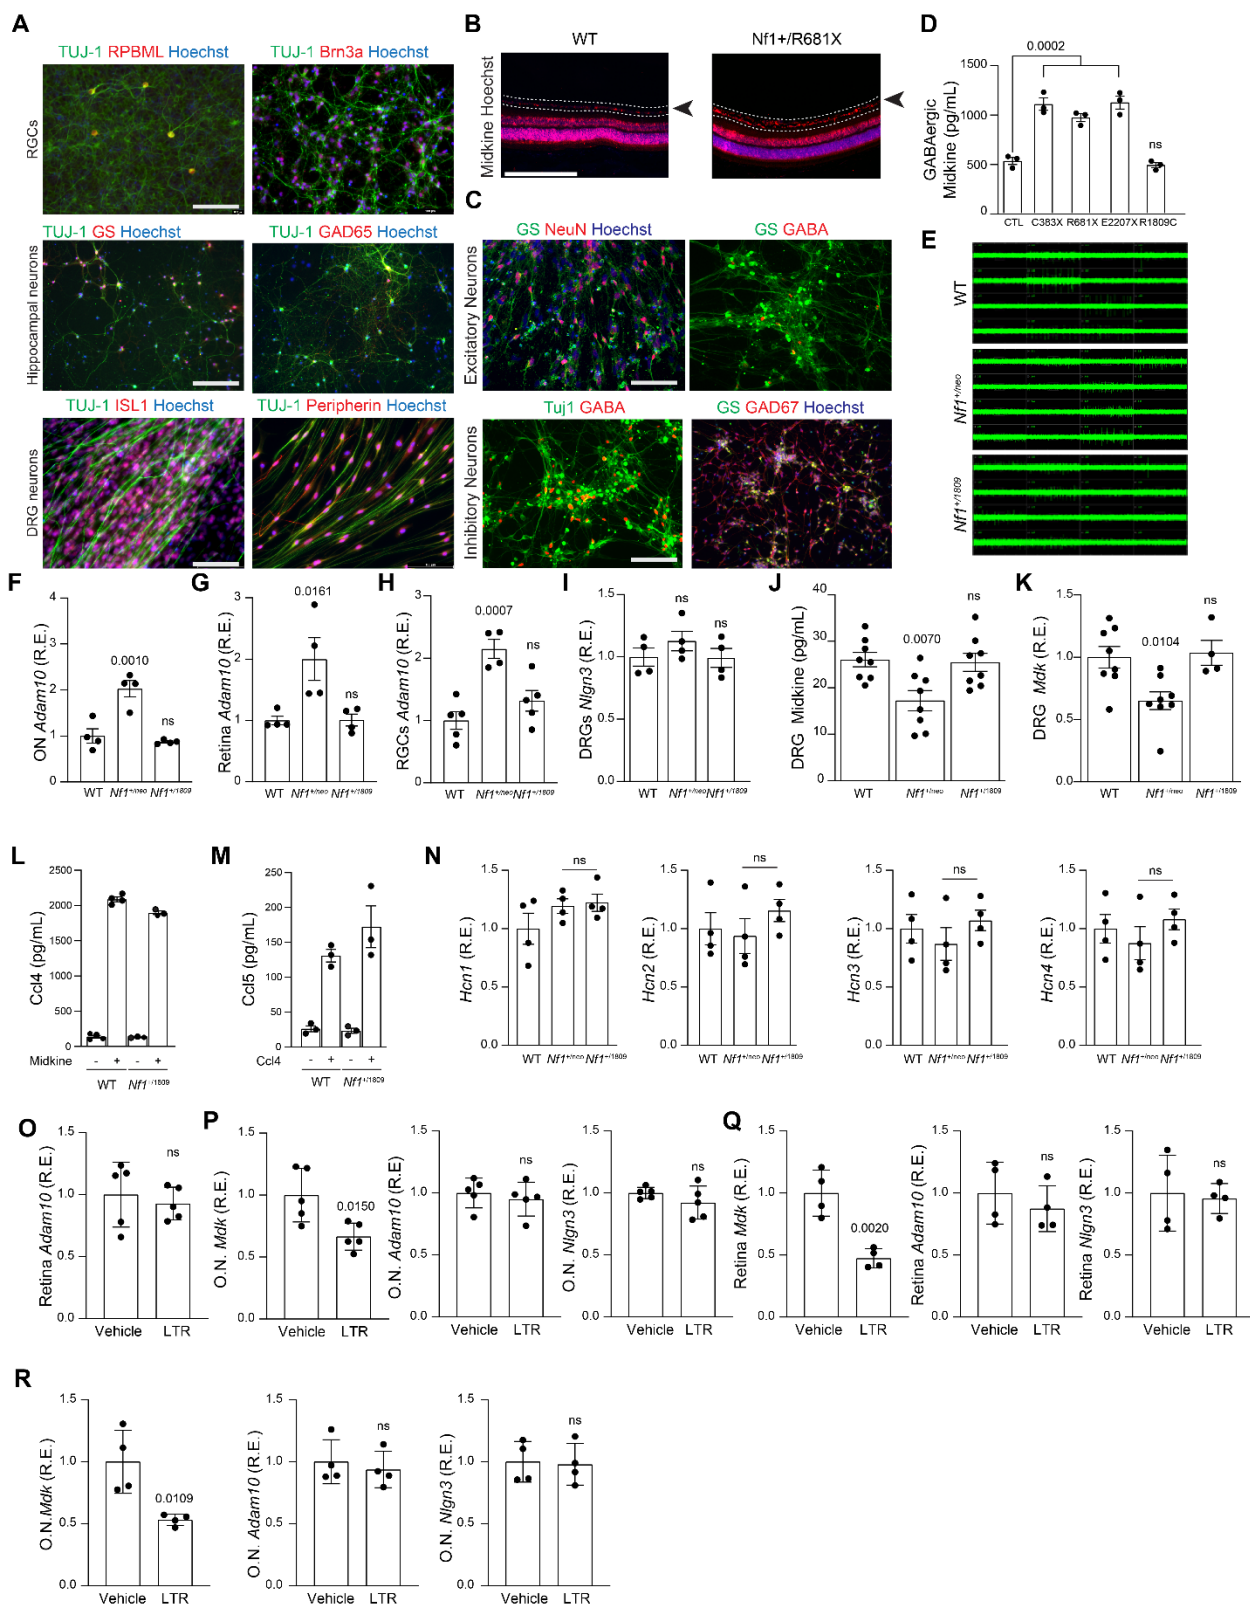

## Supplementary Figure 2. Analysis of Arg1809Cys *Nf1*-mutant neuron signaling

**A.** Immunocharacterization of retinal ganglion cells (RGCs; RPBML<sup>+</sup>, Brn3a<sup>+</sup>, TUJ-1<sup>+</sup>), hippocampal neurons (Glutamate Synthetase<sup>+</sup>, GAD65<sup>+</sup>, TUJ-1<sup>+</sup>) and dorsal root ganglia (DRG) neurons (peripherin<sup>+</sup>, Islet-1<sup>+</sup>, TUJ-1<sup>+</sup>). Scale bar, 100  $\mu$ m. Immunostaining of primary neurons was repeated independently 4 times with similar results.

**B.** Midkine expression is increased in *Nf1*<sup>+/R681X</sup> mutant RGCs relative to controls. Scale bar, 50  $\mu$ m. Immunostaining of mouse retinae was repeated on a minimum of 3 independent animals per genotype with similar results.

**C.** Immunocharacterization of excitatory (Glutamate Synthetase<sup>+</sup>, NeuN<sup>+</sup>, TUJ-1<sup>+</sup>) and inhibitory (GABA<sup>+</sup>, GAD67<sup>+</sup>, TUJ-1<sup>+</sup>) hiPSC-derived CNS neurons. Scale bar, 100  $\mu$ m. Immunostaining of hiPSC-derived neurons was repeated independently 3 times with similar results.

**D.** Midkine expression is increased in human CNS inhibitory (GABAergic) *NFI*<sup>C383X</sup>, *NFI*<sup>R681X</sup> and *NFI*<sup>E2207X</sup>, but not in *NFI*<sup>R1809C</sup>, mutant neurons relative to controls (CTL). n=3 for all groups, p=0.0002.

**E.** Representative summary of multi-electrode array recordings of WT, *Nf1*<sup>+/neo</sup> and *Nf1*<sup>+/1809</sup> RGCs illustrating action potentials detected by each electrode over a period of 5 minutes.

**F-H.** Adam-10 (*Adam10*) transcript expression is increased in *Nf1*<sup>+/neo</sup> relative to WT and *Nf1*<sup>+/1809</sup> optic nerves, retinae and RGCs. **F**, n=4 for all groups, p=0.0010; **G**, n=4 for all groups, p=0.0161; **H**, WT n=5, *Nf1*<sup>+/neo</sup>, *Nf1*<sup>+/1809</sup> n=4, p=0.0007

**I.** *Nlgn3* transcript expression is similar in *Nf1*<sup>+/neo</sup>, *Nf1*<sup>+/1809</sup> and WT DRG neurons. n=4 for all groups.

**J-K.** Midkine (*Mdk*) (**J**) RNA and (**K**) protein expression are not increased in *Nf1*-mutant DRG neurons relative to WT controls. **J**, n=8 for all groups, p=0.007. **K**, WT n=8, *Nf1*<sup>+/neo</sup> n=8, *Nf1*<sup>+/1809</sup> n=4, p=0.0104.

**L.** Ccl4 expression is increased similarly in WT (n=4) and Arg1809Cys *Nf1*-mutant (n=3) hippocampal neurons following midkine treatment.

**M.** Ccl5 is similarly elevated in WT (n=3) and Arg1809Cys *Nf1*-mutant (n=3) hippocampal neurons following Ccl4 treatment.

**N.** *Hcn1-4* RNA expression is not different in *Nf1*-mutant RGC neurons relative to WT controls. n=4 for all groups.

**O.** *Adam10* transcript expression is unchanged in retinae of 12 week-old *Nf1*<sup>+/*neo*</sup> mice following *in vivo* lamotrigine (LTR; 200μM) treatment. n=5 for all groups.

**P.** *Mdk*, *Adam10*, and *Nlgn3* transcript expression in the optic nerves (O.N.) of 12-week-old *Nf1*<sup>+/*neo*</sup> mice following *in vivo* LTR treatment. n=5 for all groups, O.N. *Mdk* R.E.p=0.015.

**Q-R.** *Mdk*, *Adam10*, and *Nlgn3* transcript expression in **(Q)** retinae (*Mdk* R.E. p=0.0020) and **(R)** optic nerves (*Mdk* R.E. p=0.0109) of 12 week-old *Nf1*-OPG mice following *in vivo* LTR treatment. n=4 for all groups.

Data are represented as means ± SEM. **(D, F-N)** One-way ANOVA with **(D, F-K)** Dunnett's or **(N)** Bonferroni post-test correction **(O-R)** two-tailed paired t-test. p values are indicated within each panel. ns, not significant. Source data are provided as a Source Data file.

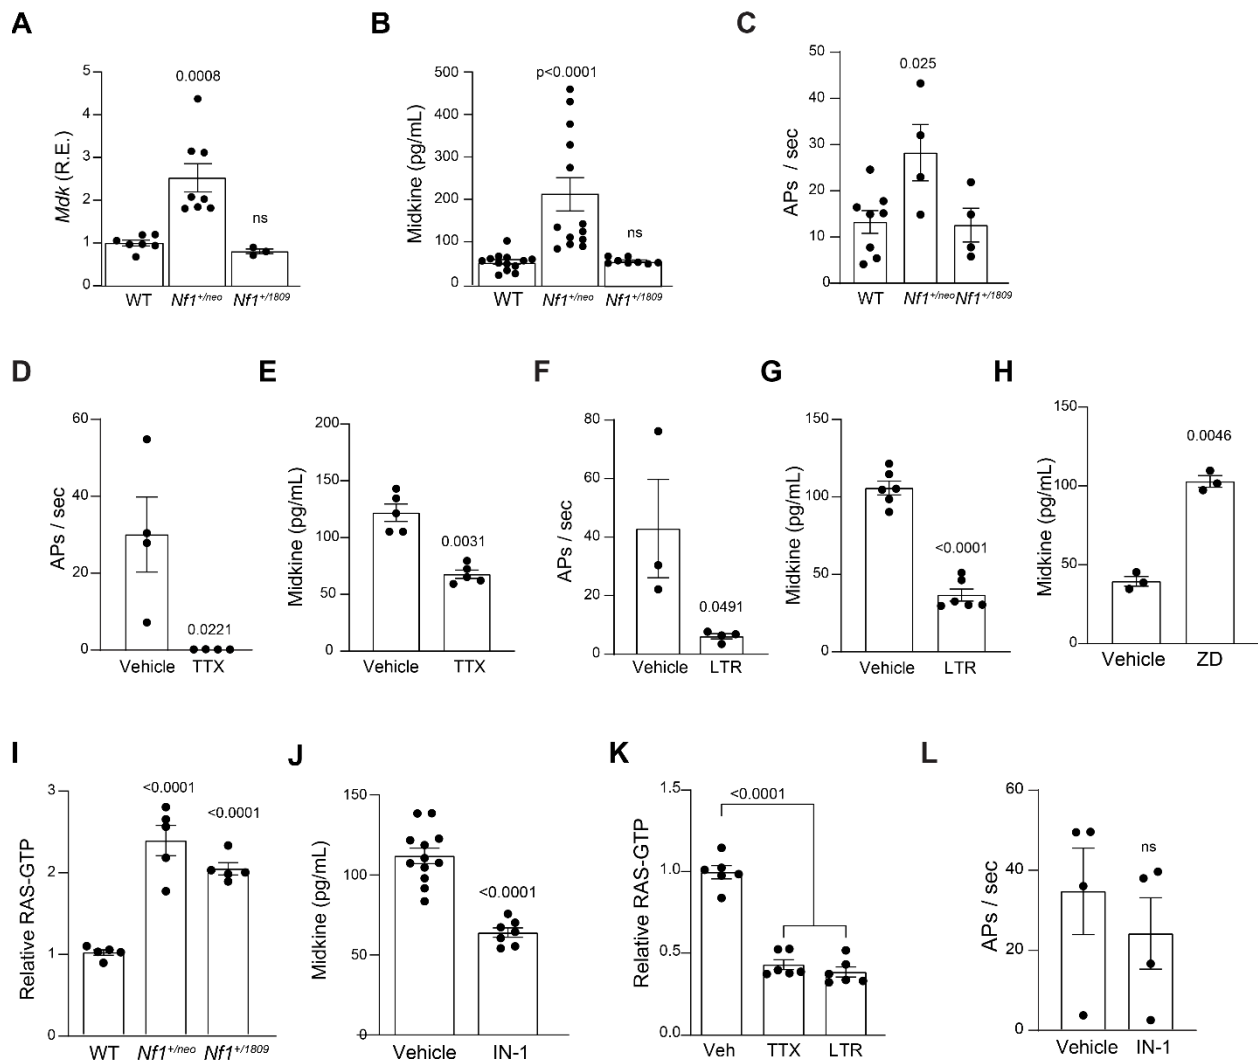

**Supplementary Figure 3. *Nf1*-mutant hippocampal neuron midkine secretion is dependent on neuronal hyperexcitability**

**A-B.** Midkine (A) transcript (*Mdk*) and (B) protein expression are increased in hippocampal neurons from *Nf1*<sup>+/*neo*</sup> mice (n=8; *Mdk* R.E. p=0.0008; Midkine p<0.0001) relative to WT controls (n=7) and *Nf1*<sup>+/*1809*</sup> mice (n=3).

**C.** Hippocampal neuron activity, as measured by action potential (AP) firing rates, is increased in *Nf1*<sup>+/*neo*</sup> (n=4; p=0.025) relative to WT (n=8) and *Nf1*<sup>+/*1809*</sup> (n=4) neurons.

**D-G. (D-E)** Tetrodotoxin (TTX; 1 $\mu$ M; **D**, n=4 for both groups, p=0.0221; **E**, n=5 for both groups, p=0.0002) and (**F-G**) lamotrigine (LTR; 200 $\mu$ M; **F**, vehicle n=3, LTR n=4, p=0.0491; **G**, n=6 for both groups, p<0.001) reduced (**D**) AP firing rates of and (**E**) midkine expression in *Nf1<sup>+neo</sup>* hippocampal neurons.

**H.** ZD-7288 (30 $\mu$ M) increases midkine secretion by *Nf1<sup>+neo</sup>* hippocampal neurons. n=3 for both groups, p=0.0046.

**I.** RAS activity is elevated in *Nf1<sup>+neo</sup>* and *Nf1<sup>+1809</sup>* hippocampal neurons relative to WT controls. n=5 for both groups, p<0.0001.

**J.** Hippocampal neuron midkine secretion is reduced following IN-1 treatment (1 $\mu$ M). Vehicle n=12, IN-1 n=7, p<0.0001.

**K.** RAS activity is reduced in *Nf1<sup>+neo</sup>* neurons following TTX and LTR treatment. n=6 for all groups, p<0.0001.

**L.** *Nf1<sup>+neo</sup>* hippocampal neuron AP firing rates are not reduced following IN-1 treatment. n=4 for both groups.

Data are represented as means  $\pm$  SEM, (**A-C**; **I, K**) One-way ANOVA with Dunnett's post-test correction or (**D-H, J, L**) unpaired two-tailed student's t-test. p values are indicated within each panel. ns, not significant. Source data are provided as a Source Data file.

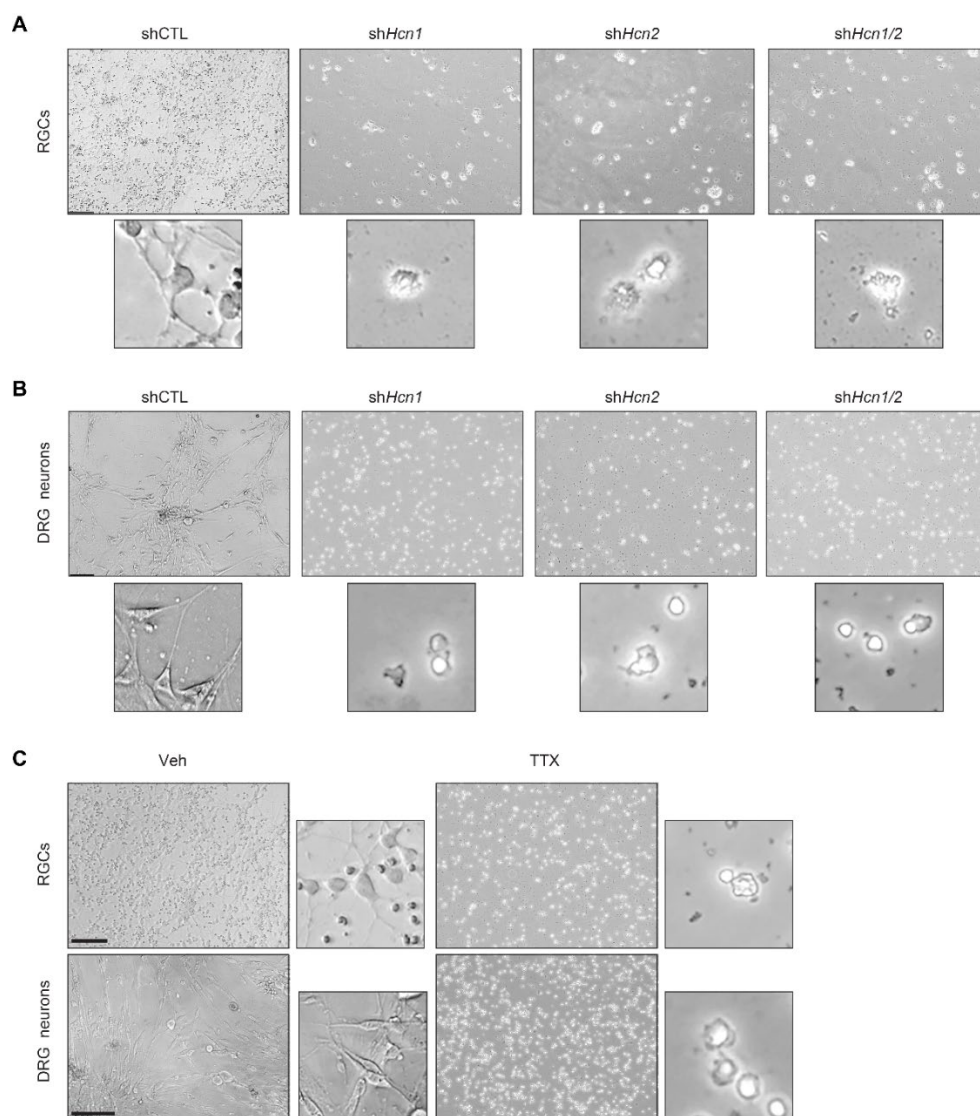

**Supplementary Figure 4. Genetic silencing of *Hcn1* and *Hcn2* results in neuronal death.**

**A-B.** Representative phase-contrast images depicting **(A)** RGCs or **(B)** DRG neurons infected with scrambled control, sh*Hcn1*, sh*Hcn2*, or a combination of sh*Hcn1* and sh*Hcn2*. Silencing of *Hcn1/2* lead to neuronal death. Independently generated primary RGC and DRG neurons were infected 3 times with similar results.

**C.** 6-hour treatment with TTX induced RGC and DRG neuronal cell death. Independently generated primary RGC and DRG neurons were treated with TTX 3 times with similar results.

Scale bars, 100 $\mu$ m



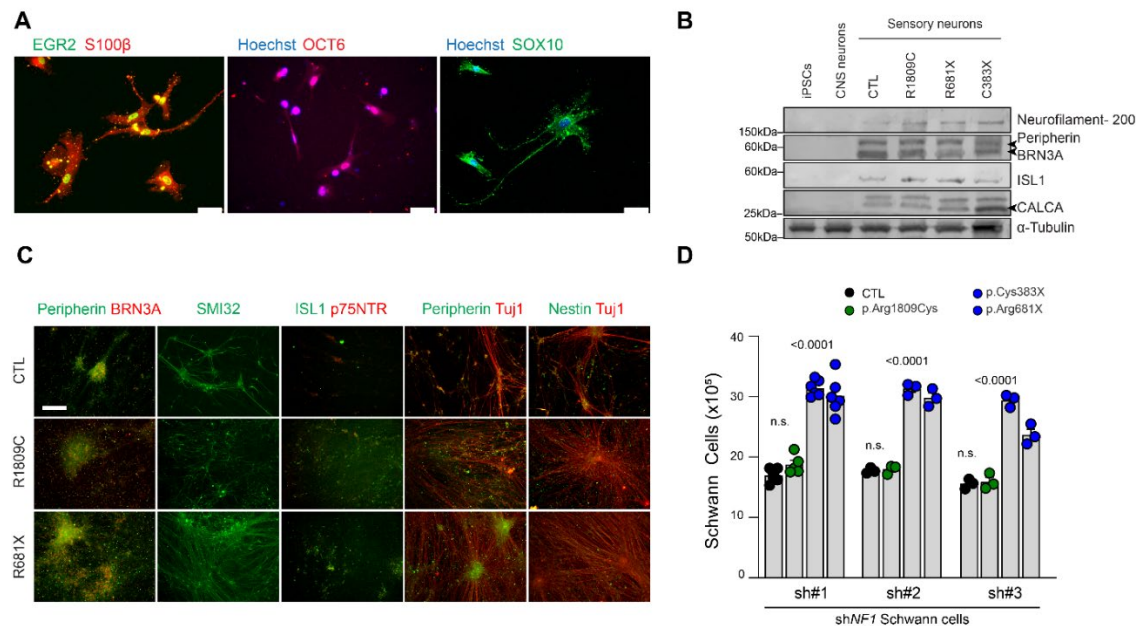

### Supplementary Figure 5. Human *shNF1* Schwann cell and sensory neuron analysis

**A.** Human *shNF1* Schwann cells are immunopositive for EGR2, S100 $\beta$ , OCT6 and SOX10 expression. Immunostaining of human Schwann cells was repeated independently 3 times with similar results. Scale bars, 50  $\mu$ m.

**B-C.** *NF1*<sup>+/-</sup> hiPSC-sensory neurons are immunopositive for **(B)** neurofilament, peripherin, BRN3A, ISL-1, and CALCA1 expression by western blot, as well as for **(C)** SMI32 and Tuj-1 by immunocytochemistry, but are immunonegative for Nestin and p75NTR expression. Scale bars, 50  $\mu$ m. Immunostaining of hiPSC-sensory neurons was repeated independently a minimum of 3 times with similar results.

**D.** *shNF1* human Schwann cell proliferation following hiPSC-sensory neuron CM treatment. CTL sh#1 n=6, Arg1809Cys sh#1 n=5, ns, Cys383X sh#1 n=6, p<0.0001, Arg681X sh#1 n=6, p<0.0001. CTL sh#2 n=3, Arg1809Cys sh#2 n=3, ns, Cys383X sh#2 n=3, p<0.0001, Arg681X sh#2 n=3, p<0.0001. CTL sh#3 n=3, Arg1809Cys sh#3 n=3, ns, Cys383X sh#3 n=3, p<0.0001, Arg681X sh#3 n=3, p<0.0001.

Data are represented as means  $\pm$  SEM, 2-tailed paired t-tests or One-way ANOVA with Bonferroni post-test correction. p values are indicated within each panel. ns, not significant. Source data are provided as a Source Data file.

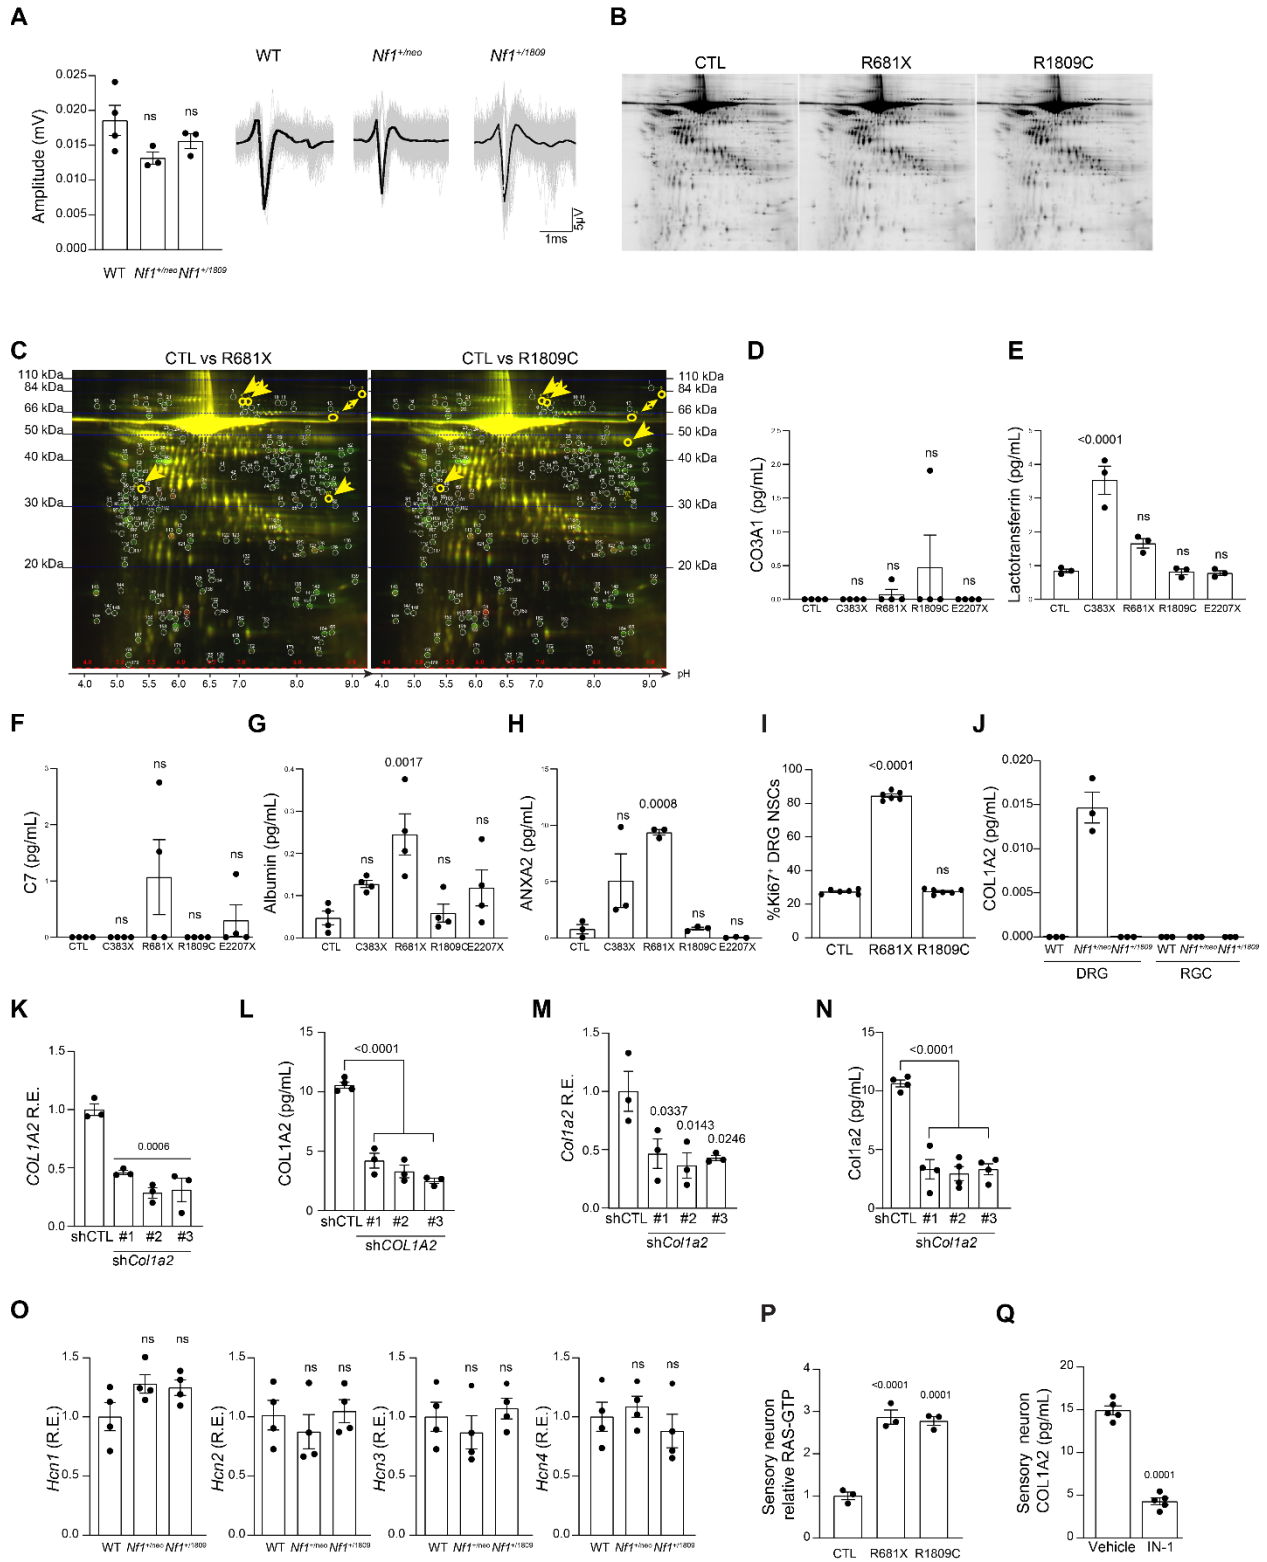

**Supplementary Figure 6. COL1A2 is uniquely expressed by *NFI*-mutant peripheral nervous system neurons.**

**A.** The amplitudes of action potentials were similar in *NfI*<sup>+/*neo*</sup> (n=3) and *NfI*<sup>+/*1809*</sup> (n=3) DRG neurons relative to WT controls (n=4). Right panels: representative traces of DRG neuron action potentials over 3 msec (gray). The averages of the DRG action potential traces are indicated in black.

**B-C.** (B) 2D gels of control (CTL), *NFI*<sup>R681X</sup> (R681X) and *NFI*<sup>R1809C</sup> (1809) human sensory neuron conditioned media and (C) annotation of increased (green) and decreased (red) proteins in CM of R681X (left) or R1809C (right) *NFI*-mutant relative to control sensory neurons.

**D-H.** COL2A1, lactotransferrin, C7, albumin and ANXA2 expression in independently-generated hiPSC-sensory neuron CM were not uniquely elevated in *NFI*<sup>C383X</sup>- and *NFI*<sup>R681X</sup>-mutant neurons relative to controls and *NFI*<sup>R1809C</sup>-mutant neurons. **D**, n=4 all groups. **E**, n=3 all groups, C383X p<0.0001. **F**, n=4 all groups. **G**, n=4 all groups, R681X p<0.0001. **H**, n=3 all groups, R681X p=0.0008.

**I.** Increased proliferation (%Ki67<sup>+</sup> cells) of mouse *NfI*<sup>-/-</sup> DRG-NSCs following treatment with human *NFI*<sup>R681X</sup>-, but not CTL- and *NFI*<sup>R1809C</sup>-mutant, hiPSC-sensory neuron CM. n=6 all groups, p<0.0001.

**J.** *Col1a2* expression is increased in mouse *NfI*<sup>+/*neo*</sup> DRG neurons, but not in mouse *NfI*<sup>+/*neo*</sup> RGC neurons. n=3 all groups.

**K-N** Genetic inhibition of (**K-L**) human *COL1A2* or (**M-N**) mouse *Col1a2* with three independent short hairpin constructs reduces *COL1A2* and *Col1a2* (**K, M**) transcript and (**L, N**) protein expression relative to a control scrambled short hairpin (shCTL). **K**, n=3 all groups, p=0.0006. **L**, shCTL n=4, sh*COL1A2* #1-3 n=3; p<0.0001. **M**, n=3 all groups; sh*Col1a2* #1 p=0.0337, sh*Col1a2* #2 p=0.0143, sh*Col1a2* #3 p=0.0246. **N**, n=4 all groups, p<0.0001.

**O.** *Hcn1-4* expression is not altered in *NfI*-mutant DRG neurons relative to WT controls. n=4 all groups.

**P.** RAS activity is increased in human *NFI*<sup>R681X</sup>- and *NFI*<sup>R1809C</sup>-mutant hiPSC-sensory neurons relative to controls. n=3 all groups, R681X p<0.0001, R1809C p=0.0001.

**Q.** COL1A2 is reduced in *NFI*<sup>R681X</sup>-mutant hiPSC-sensory neurons following IN-1 treatment. n=5 both groups, p<0.0001.

Data are represented as means  $\pm$  SEM, (**A, D-P**) One-way ANOVA with Dunnett's post-test correction or (**Q**) two-tailed paired t-test. p values are indicated within each panel. ns, not significant. Source data are provided as a Source Data file.

**Supplementary Table 1. Antibodies used**

| Antibody                                            | Dilution | Validation (application)   | Product Link                                                                                                                                                                                                                                                                      | Manufacturer                | Catalog# Number |
|-----------------------------------------------------|----------|----------------------------|-----------------------------------------------------------------------------------------------------------------------------------------------------------------------------------------------------------------------------------------------------------------------------------|-----------------------------|-----------------|
| Alexa Fluor 488 goat anti-mouse secondary antibody  | 1:200    | Fisher Scientific (IF/ICC) | <a href="https://www.thermofisher.com/antibody/product/Goat-anti-Mouse-IgG-H-L-Highly-Cross-Adsorbed-Secondary-Antibody-Polyclonal/A-11029">https://www.thermofisher.com/antibody/product/Goat-anti-Mouse-IgG-H-L-Highly-Cross-Adsorbed-Secondary-Antibody-Polyclonal/A-11029</a> | Fisher Scientific           | A11029          |
| Alexa Fluor 568 goat anti-rabbit secondary antibody | 1:200    | Fisher Scientific (IF/ICC) | <a href="https://www.thermofisher.com/antibody/product/Goat-anti-Rabbit-IgG-H-L-Cross-Adsorbed-Secondary-Antibody-Polyclonal/A-11011">https://www.thermofisher.com/antibody/product/Goat-anti-Rabbit-IgG-H-L-Cross-Adsorbed-Secondary-Antibody-Polyclonal/A-11011</a>             | Fisher Scientific           | A11011          |
| Anti-actin                                          | 1:5,000  | CST (WB)                   | <a href="https://www.cellsignal.com/products/primary-antibodies/b-actin-13e5-rabbit-mab/4970">https://www.cellsignal.com/products/primary-antibodies/b-actin-13e5-rabbit-mab/4970</a>                                                                                             | Cell Signaling Technologies | 4970            |
| Anti-alpha-tubulin                                  | 1:5,000  | Sigma-Aldrich (WB)         | <a href="https://www.sigmaaldrich.com/US/en/product/sigma/t9026">https://www.sigmaaldrich.com/US/en/product/sigma/t9026</a>                                                                                                                                                       | Sigma Aldrich               | T9026           |
| Anti-beta III Tubulin antibody [2G10]               | 1:1,000  | Abcam (WB, ICC)            | <a href="https://www.abcam.com/beta-iii-tubulin-antibody-2g10-neuronal-marker-ab78078.html">https://www.abcam.com/beta-iii-tubulin-antibody-2g10-neuronal-marker-ab78078.html</a>                                                                                                 | Abcam                       | ab78078         |
| Anti-BRN3A, Rabbit monoclonal [EPR23257-285]        | 1:1,000  | Abcam (IHC, WB)            | <a href="https://www.abcam.com/brn3a-antibody-epr23257-285-ab245230.html">https://www.abcam.com/brn3a-antibody-epr23257-285-ab245230.html</a>                                                                                                                                     | Abcam                       | ab245230        |
| Anti-CD3 antibody                                   | 1:50     | Abcam (IHC)                | <a href="https://www.abcam.com/cd3-antibody-cd3-12-ab11089.html">https://www.abcam.com/cd3-antibody-cd3-12-ab11089.html</a>                                                                                                                                                       | Abcam                       | ab11089         |
| Anti-CD34                                           | 1:2,500  | Abcam (IHC)                | <a href="https://www.abcam.com/cd34-antibody-ep373y-ab81289.html">https://www.abcam.com/cd34-antibody-ep373y-ab81289.html</a>                                                                                                                                                     | Abcam                       | ab81289         |
| Anti-CGRP (CALCA)                                   | 1:500    | Abcam (WB)                 | <a href="https://www.abcam.com/cgrp-antibody-ab189786.html">https://www.abcam.com/cgrp-antibody-ab189786.html</a>                                                                                                                                                                 | Abcam                       | ab189786        |
| Anti-Coll1a2 (for mouse samples)                    | 1:200    | ThermoFisher (IHC)         | <a href="https://www.thermofisher.com/antibody/product/COL1A2-Antibody-Polyclonal/PA5-106555">https://www.thermofisher.com/antibody/product/COL1A2-Antibody-Polyclonal/PA5-106555</a>                                                                                             | ThermoFisher                | PA5-106555      |
| Anti-COL1A2 antibody (for human samples)            | 1:200    | Abcam (ICC)                | <a href="https://www.abcam.com/coll1a2-antibody-ab96723.html">https://www.abcam.com/coll1a2-antibody-ab96723.html</a>                                                                                                                                                             | Abcam                       | ab96723         |
| Anti-EGR2                                           | 1:100    | Abcam (ICC)                | <a href="https://www.abcam.com/egr2-antibody-ot1f10-ab156765.html">https://www.abcam.com/egr2-antibody-ot1f10-ab156765.html</a>                                                                                                                                                   | Abcam                       | ab156765        |
| Anti-Factor XIIIa                                   | 1:100    | Abcam (IHC)                | <a href="https://www.abcam.com/factor-xiii-a-antibody-ac-1a1-ab1834.html">https://www.abcam.com/factor-xiii-a-antibody-ac-1a1-ab1834.html</a>                                                                                                                                     | Abcam                       | ab1834          |

|                                                  |         |                             |                                                                                                                                                                                                                                                                                                                                                                                                                                                                                                                                                                                                                                             |                             |           |
|--------------------------------------------------|---------|-----------------------------|---------------------------------------------------------------------------------------------------------------------------------------------------------------------------------------------------------------------------------------------------------------------------------------------------------------------------------------------------------------------------------------------------------------------------------------------------------------------------------------------------------------------------------------------------------------------------------------------------------------------------------------------|-----------------------------|-----------|
| Anti-GABA                                        | 1:1,000 | Sigma (ICC)                 | <a href="https://www.sigmaaldrich.com/US/en/product/sigma/a2052">https://www.sigmaaldrich.com/US/en/product/sigma/a2052</a>                                                                                                                                                                                                                                                                                                                                                                                                                                                                                                                 | Sigma Aldrich               | A2052     |
| Anti-GAD2, Rabbit monoclonal [D5G2]              | 1:500   | CST (IF)                    | <a href="https://www.cellsignal.com/products/primary-antibodies/gad2-d5g2-xp-rabbit-mab/5843">https://www.cellsignal.com/products/primary-antibodies/gad2-d5g2-xp-rabbit-mab/5843</a>                                                                                                                                                                                                                                                                                                                                                                                                                                                       | Cell Signaling Technologies | 5843S     |
| Anti-GAP43                                       | 1:2000  | Abcam (IHC)                 | <a href="https://www.abcam.com/gap43-antibody-neuronal-marker-ab12274.html">https://www.abcam.com/gap43-antibody-neuronal-marker-ab12274.html</a>                                                                                                                                                                                                                                                                                                                                                                                                                                                                                           | Abcam                       | ab12274   |
| Anti-GFAP, Rat monoclonal [2.2B10]               | 1:500   | ThermoFisher (IHC, ICC, IF) | <a href="https://www.thermofisher.com/antibody/product/13-0300.html?ef_id=EAIAIQobChMIlby2rZKR9wIV7m1vBB3ySAD5EAAAYASAAEgKDafD_BwE:G:s&amp;s_kwid=AL!3652!3!459736943987!!!g!!&amp;cid=bid_pca_aup_r01_c_o_cp1359_pjt0000_bid0000_0se_gaw_dy_pur_con&amp;gclid=EAIAIQobChMIlby2rZKR9wIV7m1vBB3ySAD5EAAAYASAAEgKDafD_BwE">https://www.thermofisher.com/antibody/product/13-0300.html?ef_id=EAIAIQobChMIlby2rZKR9wIV7m1vBB3ySAD5EAAAYASAAEgKDafD_BwE:G:s&amp;s_kwid=AL!3652!3!459736943987!!!g!!&amp;cid=bid_pca_aup_r01_c_o_cp1359_pjt0000_bid0000_0se_gaw_dy_pur_con&amp;gclid=EAIAIQobChMIlby2rZKR9wIV7m1vBB3ySAD5EAAAYASAAEgKDafD_BwE</a> | ThermoFisher                | 13-0300   |
| Anti-Glutamate synthetase mouse monoclonal [3B6] | 1:500   | Abcam (ICC)                 | <a href="https://www.abcam.com/glutamine-synthetase-antibody-3b6-bsa-and-azide-free-ab64613.html">https://www.abcam.com/glutamine-synthetase-antibody-3b6-bsa-and-azide-free-ab64613.html</a>                                                                                                                                                                                                                                                                                                                                                                                                                                               | Abcam                       | ab64613   |
| Anti-Glutamate synthetase rabbit polyclonal      | 1:500   | Abcam (ICC)                 | <a href="https://www.abcam.com/glutamine-synthetase-antibody-ab228590.html">https://www.abcam.com/glutamine-synthetase-antibody-ab228590.html</a>                                                                                                                                                                                                                                                                                                                                                                                                                                                                                           | Abcam                       | ab228590  |
| Anti-Iba1                                        | 1:500   | Wako (IHC)                  | <a href="https://labchem-wako.fujifilm.com/us/category/01213.html">https://labchem-wako.fujifilm.com/us/category/01213.html</a>                                                                                                                                                                                                                                                                                                                                                                                                                                                                                                             | Wako                        | NC9288364 |
| Anti-ISL-1 Rabbit monoclonal [EP4182]            | 1:250   | Abcam (ICC)                 | <a href="https://www.abcam.com/islet-1-antibody-ep4182-neural-stem-cell-marker-ab109517.html">https://www.abcam.com/islet-1-antibody-ep4182-neural-stem-cell-marker-ab109517.html</a>                                                                                                                                                                                                                                                                                                                                                                                                                                                       | Abcam                       | ab109517  |
| anti-Ki-67, Mouse monoclonal [B56]               | 1:500   | BD Biosciences (ICC), (1)   | <a href="https://www.fishersci.com/shop/products/anti-ki-67-clone-b56-bd-6/BDB556003">https://www.fishersci.com/shop/products/anti-ki-67-clone-b56-bd-6/BDB556003</a>                                                                                                                                                                                                                                                                                                                                                                                                                                                                       | BD Biosciences              | BDB556003 |
| Anti-Midkine C-terminal                          | 1:200   | Abcam (IHC/IF), (2)         | <a href="https://www.abcam.com/midkine-antibody-c-terminal-ab170820.html">https://www.abcam.com/midkine-antibody-c-terminal-ab170820.html</a>                                                                                                                                                                                                                                                                                                                                                                                                                                                                                               | Abcam                       | ab170820  |

|                                                                                |          |                            |                                                                                                                                                                                                                                                                                                                                                         |                             |            |
|--------------------------------------------------------------------------------|----------|----------------------------|---------------------------------------------------------------------------------------------------------------------------------------------------------------------------------------------------------------------------------------------------------------------------------------------------------------------------------------------------------|-----------------------------|------------|
| Anti-Mouse IgG Polyclonal Secondary Antibody IRDye® 800RD                      | 1:5,000  | Li-Cor Biosciences (WB)    | <a href="https://www.licor.com/bio/reagents/irdye-800c-goat-anti-mouse-igg-secondary-antibody?ppc_keyword=&amp;gclid=EAIaIQobChMI8fCg25OR9wIVNntvBB1Y-AkcEAAAYASAAEgK8mPD BwE">https://www.licor.com/bio/reagents/irdye-800c-goat-anti-mouse-igg-secondary-antibody?ppc_keyword=&amp;gclid=EAIaIQobChMI8fCg25OR9wIVNntvBB1Y-AkcEAAAYASAAEgK8mPD BwE</a> | Li-Cor Biosciences          | 926-32210  |
| Anti-Nestin                                                                    | 1:200    | Abcam (ICC)                | <a href="https://www.abcam.com/nestin-antibody-neural-stem-cell-marker-ab92391.html">https://www.abcam.com/nestin-antibody-neural-stem-cell-marker-ab92391.html</a>                                                                                                                                                                                     | Abcam                       | ab92391    |
| Anti-NeuN mouse monoclonal [A60]                                               | 1:500    | Sigma-Aldrich (ICC)        | <a href="https://www.sigmaaldrich.com/US/en/product/mab/mab377">https://www.sigmaaldrich.com/US/en/product/mab/mab377</a>                                                                                                                                                                                                                               | Sigma-Aldrich               | MAB377     |
| anti-Neurofilament H (NF-H), Nonphosphorylated Antibody mouse monoclonal SMI32 | 1:500    | Biolegend (WB, IF)         | <a href="https://www.biolegend.com/en-us/products/purified-anti-neurofilament-h-nf-h-nonphosphorylated-antibody-11475">https://www.biolegend.com/en-us/products/purified-anti-neurofilament-h-nf-h-nonphosphorylated-antibody-11475</a>                                                                                                                 | Biolegend                   | 801701     |
| Anti-neuroigin-3                                                               | 0.4µg/mL | Novus (WB), (1)            | <a href="https://www.novusbio.com/products/neuroigin-3-nlgn3-antibody_nbp1-90080">https://www.novusbio.com/products/neuroigin-3-nlgn3-antibody_nbp1-90080</a>                                                                                                                                                                                           | Novus                       | NBP1-90080 |
| Anti-OCT6                                                                      | 1:200    | Abcam (ICC)                | <a href="https://www.abcam.com/oct6-antibody-ab272925.html">https://www.abcam.com/oct6-antibody-ab272925.html</a>                                                                                                                                                                                                                                       | Abcam                       | ab272925   |
| Anti-p75 NTR rabbit monoclonal [D4B3]                                          | 1:1000   | CST (ICC)                  | <a href="https://www.cellsignal.com/products/primary-antibodies/p75ntr-d4b3-xp-rabbit-mab/8238">https://www.cellsignal.com/products/primary-antibodies/p75ntr-d4b3-xp-rabbit-mab/8238</a>                                                                                                                                                               | Cell Signaling Technologies | 8238S      |
| Anti-peripherin                                                                | 1:500    | Abcam (ICC)                | <a href="https://www.abcam.com/peripherin-antibody-ab4666.html">https://www.abcam.com/peripherin-antibody-ab4666.html</a>                                                                                                                                                                                                                               | Abcam                       | ab4666     |
| Anti-Rabbit IgG Polyclonal Secondary Antibody IRDye® 680RD                     | 1:5,000  | Li-Cor Biosciences (WB)    | <a href="https://www.licor.com/bio/reagents/irdye-680rd-goat-anti-rabbit-igg-secondary-antibody">https://www.licor.com/bio/reagents/irdye-680rd-goat-anti-rabbit-igg-secondary-antibody</a>                                                                                                                                                             | Li-Cor Biosciences          | 926-68071  |
| Anti-Rbpms                                                                     | 1:1,000  | PhosphoSolutions (ICC/ IF) | <a href="https://www.phosphosolutions.com/products/anti-rbpms-antibody-1832-rbpms">https://www.phosphosolutions.com/products/anti-rbpms-antibody-1832-rbpms</a>                                                                                                                                                                                         | PhosphoSolutions            | 1832-RBPMS |
| Anti-S100β antibody, Rabbit monoclonal [EP1576Y]                               | 1:100    | Abcam (ICC)                | <a href="https://www.abcam.com/s100-beta-antibody-ep1576y-astrocyte-marker-ab52642.html">https://www.abcam.com/s100-beta-antibody-ep1576y-astrocyte-marker-ab52642.html</a>                                                                                                                                                                             | Abcam                       | ab52642    |

|                                                                         |       |                  |                                                                                                                                                                         |                     |          |
|-------------------------------------------------------------------------|-------|------------------|-------------------------------------------------------------------------------------------------------------------------------------------------------------------------|---------------------|----------|
| Anti-SOX10 antibody, Rabbit monoclonal [EPR4007-104] (for mouse tumors) | 1:250 | Abcam (IHC), (3) | <a href="https://www.abcam.com/sox10-antibody-epr4007-104-ab180862.html">https://www.abcam.com/sox10-antibody-epr4007-104-ab180862.html</a>                             | Abcam               | ab180862 |
| Anti-SOX10, Rabbit monoclonal [SP267] (for human cells)                 | 1:50  | Abcam (ICC)      | <a href="https://www.abcam.com/sox10-antibody-sp267-ab227680.html">https://www.abcam.com/sox10-antibody-sp267-ab227680.html</a>                                         | Abcam               | ab227680 |
| Biotinylated anti Mouse secondary antibody                              | 1:200 | Fisher (IHC)     | <a href="https://vectorlabs.com/products/antibodies/biotinylated-goat-anti-mouse-igg">https://vectorlabs.com/products/antibodies/biotinylated-goat-anti-mouse-igg</a>   | Vector Laboratories | BA9200   |
| Biotinylated anti Rabbit secondary antibody                             | 1:200 | Fisher (IHC)     | <a href="https://vectorlabs.com/products/antibodies/biotinylated-goat-anti-rabbit-igg">https://vectorlabs.com/products/antibodies/biotinylated-goat-anti-rabbit-igg</a> | Vector Laboratories | BA-1000  |

WB, Western blot; IHC, immunohistochemistry; IF, immunofluorescence; ICC, immunocytochemistry



**Supplementary Table 2. Oligonucleotides used for quantitative real-time PCR**

| Oligonucleotides                                      | Manufacturer | Catalog Number |
|-------------------------------------------------------|--------------|----------------|
| <i>ADAM10</i> - TaqMan® Gene Expression Assay FAM-MGB | ThermoFisher | Hs01109562_m1  |
| <i>Adam10</i> - TaqMan® Gene Expression Assay FAM-MGB | ThermoFisher | Mm00545742_m1  |
| <i>COL1A2</i> - TaqMan® Gene Expression Assay FAM-MGB | ThermoFisher | Hs01028940_g1  |
| <i>Colla2</i> - TaqMan® Gene Expression Assay FAM-MGB | ThermoFisher | Mm00483888_m1  |
| <i>GAPDH</i> - TaqMan® Gene Expression Assay FAM-MGB  | ThermoFisher | Hs02786624_g1  |
| <i>Gapdh</i> - TaqMan® Gene Expression Assay FAM-MGB  | ThermoFisher | Mm99999915_g1  |
| <i>Hcn1</i> - TaqMan® Gene Expression Assay FAM-MGB   | ThermoFisher | Mm00468832_m1  |
| <i>Hcn2</i> - TaqMan® Gene Expression Assay FAM-MGB   | ThermoFisher | Mm00468538_m1  |
| <i>Hcn3</i> - TaqMan® Gene Expression Assay FAM-MGB   | ThermoFisher | Mm01212852_m1  |
| <i>Hcn4</i> - TaqMan® Gene Expression Assay FAM-MGB   | ThermoFisher | Mm01176084_m1  |
| <i>Mdk</i> - TaqMan® Gene Expression Assay FAM-MGB    | ThermoFisher | Mm00440279_m1  |
| <i>NLGN3</i> - TaqMan® Gene Expression Assay FAM-MGB  | ThermoFisher | Hs01043809_m1  |
| <i>Nlgn3</i> - TaqMan® Gene Expression Assay FAM-MGB  | ThermoFisher | Mm01225951_m1  |

**Supplementary Table 3. Available microarray datasets used for *COL1A2* analysis.**

| Sample            | Sample name                            | GSM352--- |
|-------------------|----------------------------------------|-----------|
| <i>normal SCs</i> | batch1c-NHSC_303_HG_U133_Plus_2.CEL    | 487       |
| <i>normal SCs</i> | batch1c-NHSC_339_HG_U133_Plus_2.CEL    | 489       |
| <i>normal SCs</i> | batch1c-NHSC_771_HG_U133_Plus_2.CEL    | 490       |
| <i>normal SCs</i> | batch2a-NHSC216_HG_U133_Plus_2.CEL     | 501       |
| <i>normal SCs</i> | batch2b-NHSC323_HG_U133_Plus_2.CEL     | 515       |
| <i>normal SCs</i> | batch2c-NHSC338_HG_U133_Plus_2.CEL     | 526       |
| <i>normal SCs</i> | batch3a-NHSC_286_HG_U133_Plus_2.CEL    | 535       |
| <i>normal SCs</i> | batch3b-NHSC_J017_HG_U133_Plus_2.CEL   | 543       |
| <i>normal SCs</i> | batch3c-NHSC_02.8_HG_U13Plus_2.CEL     | 550       |
| <i>normal SCs</i> | batch3c-NHSC_J037_HG_U13Plus_2.CEL     | 551       |
| <i>cNF</i>        | batch3a-dNFSC_ERS_HG_U133_Plus_2.CEL   | 534       |
| <i>cNF</i>        | batch3b-dNFSC_ABB_HG_U133_Plus_2.CEL   | 542       |
| <i>cNF</i>        | batch3c-dNFSC_JLM_HG_U13Plus_2.CEL     | 549       |
| <i>cNF</i>        | batch1c-ABC_8N_-l-_HG_U133_Plus_2.CEL  | 479       |
| <i>cNF</i>        | batch1c-AIBC_2N_-l-_HG_U133_Plus_2.CEL | 480       |
| <i>cNF</i>        | batch1c-CLT_6N_+l-_HG_U133_Plus_2.CEL  | 481       |
| <i>cNF</i>        | batch1c-MGF_33N_+l-_HG_U133_Plus_2.CEL | 483       |
| <i>cNF</i>        | batch1c-SCC_7N_-l-_HG_U133_Plus_2.CEL  | 492       |
| <i>cNF</i>        | batch2a-ADN1N_KO_HG_U133_Plus_2.CEL    | 495       |
| <i>cNF</i>        | batch2b-RMN9N_KO_HG_U133_Plus_2.CEL    | 520       |
| <i>cNF</i>        | batch2c-SCC5N_KO_HG_U133_Plus_2.CEL    | 531       |
| <i>pNF</i>        | batch3a-pNFSC_04.7_HG_U133_Plus_2.CEL  | 537       |
| <i>pNF</i>        | batch3a-pNFSC_05.4_HG_U133_Plus_2.CEL  | 538       |
| <i>pNF</i>        | batch3b-pNFSC_00.13_HG_U133_Plus_2.CEL | 544       |
| <i>pNF</i>        | batch3b-pNFSC_05.5_HG_U133_Plus_2.CEL  | 545       |
| <i>pNF</i>        | batch3c-pNFSC_97.9_HG_U13Plus_2.CEL    | 552       |
| <i>pNF</i>        | batch1b-pNF00.6_HG_U133_Plus_2.CEL     | 464       |
| <i>pNF</i>        | batch1b-pNF95.3_HG_U133_Plus_2.CEL     | 466       |
| <i>pNF</i>        | batch1b-pNF95.6_HG_U133_Plus_2.CEL     | 467       |
| <i>pNF</i>        | batch2a-pNF03.3_HG_U133_Plus_2.CEL     | 503       |
| <i>pNF</i>        | batch2b-pNF04.4_HG_U133_Plus_2.CEL     | 516       |
| <i>pNF</i>        | batch2c-pNF05.3_HG_U133_Plus_2.CEL     | 527       |

## References

1. Pan Y, Hysinger JD, Barron T, Schindler NF, Cobb O, Guo X, et al. *NF1* mutation drives neuronal activity-dependent initiation of optic glioma. *Nature*. 2021;594(7862):277-82.
2. Guo X, Pan Y, Xiong M, Sanapala S, Anastasaki C, Cobb O, et al. Midkine activation of CD8(+) T cells establishes a neuron-immune-cancer axis responsible for low-grade glioma growth. *Nat Commun*. 2020;11(1):2177.
3. Mo J, Anastasaki C, Chen Z, Shipman T, Papke J, Yin K, et al. Humanized neurofibroma model from induced pluripotent stem cells delineates tumor pathogenesis and developmental origins. *J Clin Invest*. 2021;131(1).
