# Supplementary material for: Neuronal hyperexcitability drives central and peripheral nervous system tumor progression in models of neurofibromatosis-1
Source: PubMed Central journal article supplement (PMC9120229; doi:10.1038/s41467-022-30466-6), 2022-05-19
Supplement: 41467_2022_30466_MOESM2_ESM.pdf [file 41467_2022_30466_MOESM2_ESM.pdf]

**Title:** Supplementary Movie 1.

**Description:** Representative video of WT RGC calcium imaging recordings.

**Title:** Supplementary Movie 2.

**Description:** Representative video of Nf1+/neo RGC calcium imaging recordings.

**Title:** Supplementary Movie 3.

**Description:** Representative video of Nf1+/1809 RGC calcium imaging recordings.

**Title:** Supplementary Movie 4.

Representative video of Nf1+/neo RGC calcium imaging recordings before TTX treatment.

**Title:** Supplementary Movie 5.

**Description:** Representative video of Nf1+/neo RGC calcium imaging recordings after TTX treatment.

**Title:** Supplementary Movie 6.

Representative video of Nf1+/neo RGC calcium imaging recordings before lamotrigine treatment.

**Title:** Supplementary Movie 7.

**Description:** Representative video of Nf1+/neo RGC calcium imaging recordings after lamotrigine treatment.

**Title:** Supplementary Movie 8.

**Description:** Representative video of Nf1+/neo RGC calcium imaging recordings before IN-1 treatment.

**Title:** Supplementary Movie 9.

**Description:** Representative video of Nf1+/neo RGC calcium imaging recordings after IN-1 treatment.

**Title:** Supplementary Movie 10.

**Description:** Representative video of WT DRG calcium imaging recordings.

**Title:** Supplementary Movie 11.

**Description:** Representative video of Nf1+/neo DRG calcium imaging recordings.

**Title:** Supplementary Movie 12.

**Description:** Representative video of Nf1+/1809 DRG calcium imaging recordings.

**Title:** Supplementary Movies 13.

**Description:** Representative video of Nf1+/neo DRG calcium imaging recordings before TTX and lamotrigine treatments.

**Title:** Supplementary Movie 14.

**Description:** Representative videos of Nf1+/neo DRG calcium imaging recordings after TTX treatment.

**Title:** Supplementary Movie 15.

**Description:** Representative videos of Nf1+/neo DRG calcium imaging recordings after lamotrigine treatment.

**Title:** Supplementary Movie 16.

**Description:** Representative video of Nf1+/neo DRG calcium imaging recordings before IN-1 treatment.

**Title:** Supplementary Movie 17.

**Description:** Representative video of Nf1+/neo DRG calcium imaging recordings after IN-1 treatment.
